# Supplementary material
Source: MDPI journal article supplement (https://www.mdpi.com/2311-7524/9/12/1322)
Supplement: s1 [file s1]

**Table S1.** Information about the instruments and equipment used in the experiment.

| <b>Name</b>                                             | <b>Specification</b> | <b>Manufacturer</b>                                    |
|---------------------------------------------------------|----------------------|--------------------------------------------------------|
| Electronic balance                                      | BSA2202S             | China Shandong Qiansi Scientific Instrument Co., Ltd   |
| High speed table centrifuge                             | T20R                 | China Shanghai Taida Instrument Manufacturing Co., Ltd |
| Electric thermostatic water bath                        | HH-115L              | China Jiangsu Kexi Instrument Co., Ltd                 |
| Electric heating constant temperature blast drying oven | DHG-9420A            | China Shanghai Yiheng Technology Instrument Co., Ltd.  |
| Grinding machine                                        | RRH-100              | China Shanghai Yuanwo Industry and Trade Co., Ltd      |
